# Supplementary material for: Development and implementation of SOMA: A Secondary Organic Module for Aerosol integration in high-resolution air quality simulations
Source: Copernicus journal article supplement (doi:10.5194/egusphere-2025-193), 2025-02-14
Supplement: Supplementary file 1 [file egusphere-2025-193-supplement.pdf]

## Supplementary Information

### Experimental data from SOA formation from chamber experiments

In this section we present detailed experimental information of chamber experiments for SOA formation gathered from literature for  $\alpha$ -pinene, limonene and isoprene. For each study we explain important information on the way some parameters are calculated and what assumptions were made to develop our experimental datasets.

#### $\alpha$ -pinene

Experimental information collected regarding  $\alpha$ -pinene oxidation for SOA formation derived from three different studies. In Kim et al. (2012) the oxidation time for  $\alpha$ -pinene was 4–4.5 hours without specifying, so a 4.25-hour oxidation time is selected that corresponds to 15300 seconds. Temperature and RH varied throughout the experiments and O<sub>3</sub> concentrations were calculated based on the O<sub>3</sub>/VOC ratio. In Liu et al. (2013) 30 degrees Celsius and 50 % relative humidity was established in all experiments. A 0.2 ppm level of ozone was also established in the chamber. The oxidation duration was 4 hours (14400 seconds). In Presto & Donahue (2006) no data on RH was available.

| Study                    | Experiment number | VOC concentration [ $\mu\text{g}/\text{m}^3$ ] | T [ $^{\circ}\text{C}$ ] | time [s] | RH [%] | OH [molecules/ $\text{cm}^3$ ] | NO <sub>x</sub> [ppb] | O <sub>3</sub> [ppm] | SOA measured [ $\mu\text{g}/\text{m}^3$ ] |
|--------------------------|-------------------|------------------------------------------------|--------------------------|----------|--------|--------------------------------|-----------------------|----------------------|-------------------------------------------|
| (Kim et al., 2012)       | A-PIN1            | 363.46                                         | 42                       | 15300    | 14     | N/A                            | 22                    | 0.042                | 25                                        |
|                          | A-PIN2            | 347.91                                         | 37                       | 15300    | 15     | N/A                            | 22                    | 0.042                | 26                                        |
|                          | A-PIN3            | 574.79                                         | 33                       | 15300    | 16     | N/A                            | 32                    | 0.069                | 102                                       |
|                          | A-PIN4            | 420.21                                         | 35                       | 15300    | 17     | N/A                            | 96                    | 0.045                | 18                                        |
|                          | A-PIN5            | 642.31                                         | 37                       | 15300    | 15     | N/A                            | 125                   | 0.076                | 77                                        |
| (Liu et al., 2013)       | A-PIN6            | 854.29                                         | 30                       | 14400    | 50     | N/A                            | 76.01                 | 0.2                  | 33.82                                     |
|                          | A-PIN7            | 870.72                                         | 30                       | 14400    | 50     | N/A                            | 77.1                  | 0.2                  | 65.10                                     |
|                          | A-PIN8            | 799.53                                         | 30                       | 14400    | 50     | N/A                            | 78.04                 | 0.2                  | 40.28                                     |
|                          | A-PIN9            | 1188.35                                        | 30                       | 14400    | 50     | N/A                            | 97.81                 | 0.2                  | 92.44                                     |
|                          | A-PIN10           | 1171.92                                        | 30                       | 14400    | 50     | N/A                            | 111.08                | 0.2                  | 65.26                                     |
|                          | A-PIN11           | 1122.63                                        | 30                       | 14400    | 50     | N/A                            | 95.27                 | 0.2                  | 66.91                                     |
|                          | A-PIN12           | 1182.87                                        | 30                       | 14400    | 50     | N/A                            | 102.87                | 0.2                  | 76.64                                     |
|                          | A-PIN13           | 1144.54                                        | 30                       | 14400    | 50     | N/A                            | 103.08                | 0.2                  | 73.90                                     |
|                          | A-PIN14           | 1418.35                                        | 30                       | 14400    | 50     | N/A                            | 132.01                | 0.2                  | 122.70                                    |
|                          | A-PIN15           | 1330.73                                        | 30                       | 14400    | 50     | N/A                            | 121.82                | 0.2                  | 110.35                                    |
|                          | A-PIN16           | 1347.16                                        | 30                       | 14400    | 50     | N/A                            | 122.5                 | 0.2                  | 88.79                                     |
|                          | A-PIN17           | 1610.02                                        | 30                       | 14400    | 50     | N/A                            | 130.01                | 0.2                  | 91.13                                     |
|                          | A-PIN18           | 1352.63                                        | 30                       | 14400    | 50     | N/A                            | 119.34                | 0.2                  | 88.543                                    |
|                          | A-PIN19           | 1599.07                                        | 30                       | 14400    | 50     | N/A                            | 146.67                | 0.2                  | 149.14                                    |
|                          | A-PIN20           | 1631.92                                        | 30                       | 14400    | 50     | N/A                            | 152.09                | 0.2                  | 89.31                                     |
| (Presto & Donahue, 2006) | A-PIN21           | 63.55                                          | 22                       | 14400    | N/A    | N/A                            | 26                    | 0.22                 | 0.21                                      |
|                          | A-PIN22           | 35.43                                          | 22                       | 14400    | N/A    | N/A                            | 6                     | 0.28                 | 2.68                                      |
|                          | A-PIN23           | 137.80                                         | 22                       | 14400    | N/A    | N/A                            | 5.3                   | 0.34                 | 10.70                                     |
|                          | A-PIN24           | 64.68                                          | 22                       | 14400    | N/A    | N/A                            | 41                    | 0.29                 | 0.70                                      |
|                          | A-PIN25           | 75.37                                          | 22                       | 14400    | N/A    | N/A                            | 5.5                   | 0.26                 | 6.43                                      |
|                          | A-PIN26           | 246.36                                         | 22                       | 14400    | N/A    | N/A                            | 5                     | 0.35                 | 46.60                                     |

Table S1. Experimental information for  $\alpha$ -pinene

## Limonene

Experimental information regarding limonene oxidation for SOA formation was collected from two different studies. Hammes et al. (2019) performed experiments in chambers. In Table S2 it is shown that the experiments were performed under NO<sub>x</sub>-free conditions. To account for that, in the model we used NO<sub>x</sub> level of 0.0001 ppb to select a low NO<sub>x</sub> Yield from GECKO-A model based on the NO<sub>x</sub> parameterization explained in section 3.2. Under Dry conditions we used a RH of 0%. In the study of Kim et al. (2012) no information for OH concentration could be attained. The O<sub>3</sub> levels were calculated based on the O<sub>3</sub>/VOC ratio.

| Study                 | Experiment number | VOC concentration [μg/m <sup>3</sup> ] | T [°C] | time [s] | RH [%] | OH [molecules/cm <sup>3</sup> ] | NO <sub>x</sub> [ppb] | O <sub>3</sub> [ppm] | SOA measured [μg/m <sup>3</sup> ] |
|-----------------------|-------------------|----------------------------------------|--------|----------|--------|---------------------------------|-----------------------|----------------------|-----------------------------------|
| (Hammes et al., 2019) | LIM1              | 84.94881                               | 20     | 240      | 40     | 8.71E+06                        | NO <sub>x</sub> -free | 0.4                  | 2.6                               |
|                       | LIM2              | 226.5301                               | 20     | 240      | 40     | 8.51E+06                        | NO <sub>x</sub> -free | 0.4                  | 4.2                               |
|                       | LIM3              | 849.4881                               | 20     | 240      | 40     | 8.10E+06                        | NO <sub>x</sub> -free | 0.4                  | 32                                |
|                       | LIM4              | 84.94881                               | 20     | 240      | Dry    | 8.82E+06                        | NO <sub>x</sub> -free | 0.4                  | 0.04                              |
|                       | LIM5              | 226.5301                               | 20     | 240      | Dry    | 8.61E+06                        | NO <sub>x</sub> -free | 0.4                  | 0.8                               |
|                       | LIM6              | 849.4881                               | 20     | 240      | dry    | 7.48E+06                        | NO <sub>x</sub> -free | 0.4                  | 12                                |
|                       | LIM7              | 84.94881                               | 20     | 240      | 40     | 1.64E+07                        | NO <sub>x</sub> -free | 1                    | 4.7                               |
|                       | LIM8              | 226.5301                               | 20     | 240      | 40     | 1.61E+07                        | NO <sub>x</sub> -free | 1                    | 7.3                               |
|                       | LIM9              | 849.4881                               | 20     | 240      | 40     | 1.56E+07                        | NO <sub>x</sub> -free | 1                    | 25                                |
|                       | LIM10             | 84.94881                               | 20     | 240      | Dry    | 1.66E+07                        | NO <sub>x</sub> -free | 1                    | 0.04                              |
|                       | LIM11             | 226.5301                               | 20     | 240      | Dry    | 1.64E+07                        | NO <sub>x</sub> -free | 1                    | 1.4                               |
|                       | LIM12             | 849.4881                               | 20     | 240      | dry    | 1.58E+07                        | NO <sub>x</sub> -free | 1                    | 19                                |
|                       | LIM13             | 84.94881                               | 20     | 240      | 40     | 2.48E+07                        | NO <sub>x</sub> -free | 5                    | 4                                 |
|                       | LIM14             | 226.5301                               | 20     | 240      | 40     | 2.60E+07                        | NO <sub>x</sub> -free | 5                    | 10                                |
|                       | LIM15             | 849.4881                               | 20     | 240      | 40     | 2.59E+07                        | NO <sub>x</sub> -free | 5                    | 56                                |
|                       | LIM16             | 84.94881                               | 20     | 240      | Dry    | 2.54E+07                        | NO <sub>x</sub> -free | 5                    | 4                                 |
|                       | LIM17             | 226.5301                               | 20     | 240      | Dry    | 2.67E+07                        | NO <sub>x</sub> -free | 5                    | 5.7                               |
|                       | LIM18             | 849.4881                               | 20     | 240      | Dry    | 2.65E+07                        | NO <sub>x</sub> -free | 5                    | 22                                |
| (Kim et al., 2012)    | LIM19             | 321.1613                               | 37     | 18000    | 18     | N/A                             | 20                    | 0.036                | 79.2                              |
|                       | LIM20             | 354.7917                               | 31     | 18000    | 17     | N/A                             | 20                    | 0.04                 | 109                               |
|                       | LIM21             | 414.8333                               | 35     | 18000    | 19     | N/A                             | 40                    | 0.04                 | 117                               |
|                       | LIM22             | 409.375                                | 31     | 18000    | 21     | N/A                             | 56                    | 0.038                | 136                               |
|                       | LIM23             | 388.2415                               | 39     | 18000    | 14     | N/A                             | 78                    | 0.032                | 103                               |
|                       | LIM24             | 382.9231                               | 39     | 18000    | 14     | N/A                             | 115                   | 0.03                 | 110                               |

Table S2. Experimental information for limonene

## Isoprene

This section presents the experimental information gathered for the case of isoprene. In the study of Song et al. (2019) each experiment lasted 240 minutes (14400 seconds) and the O<sub>3</sub> concentration in the chamber was 0.005 ppm. Temperature was constant at 25 degrees celcius and the conditions were dry (<10% RH). In Xu et al. (2014) all the experiments were conducted under dry conditions (RH<5%) and at 25 degrees celcius. A full experiment cycle lasted 1200 minutes (72000 seconds). Before every experiment the chambers were filled with purified air so that the O<sub>3</sub> concentrations was less than 1 ppb. Kroll et al. (2005) conducted chamber experiments for isoprene oxidation and examined the formation of SOA. RH and Temperature was different for each experiment, and no information on OH

concentration was found. Brégonzio-Rozier et al. (2015) examined isoprene oxidation for SOA formation, with two different sets of experiments in terms of OH production, one from HONO and one from NO<sub>x</sub>. The experiments from HONO had an average OH concentration of  $4 \times 10^6$  and the NO<sub>x</sub> around  $1.9 \times 10^6$ . The experiments lasted 7 hours (25200 seconds), the temperature ranged and the conditions were dry (<5% RH). Dommen et al. (2006) conducted 15-hour experiments and the RH ranged from 0-85%.

| Study                           | Experiment number | VOC concentration [μg/m <sup>3</sup> ] | T [°C] | time [s] | RH [%] | OH [molecules/cm <sup>3</sup> ] | NO <sub>x</sub> [ppb] | O <sub>3</sub> [ppm] | SOA measured [μg/m <sup>3</sup> ] |
|---------------------------------|-------------------|----------------------------------------|--------|----------|--------|---------------------------------|-----------------------|----------------------|-----------------------------------|
| (Song et al., 2019)             | ISO1              | 427.6403                               | 25     | 14400    | <10    | 1.78E+07                        | NO <sub>x</sub> -free | 0.005                | 197.1                             |
|                                 | ISO2              | 466.8963                               | 25     | 14400    | <10    | 1.49E+07                        | NO <sub>x</sub> -free | 0.005                | 166.5                             |
|                                 | ISO3              | 414.2765                               | 25     | 14400    | <10    | 1.13E+06                        | NO <sub>x</sub> -free | 0.005                | 70.2                              |
|                                 | ISO4              | 437.1063                               | 25     | 14400    | <10    | 9.89E+06                        | NO <sub>x</sub> -free | 0.005                | 49.3                              |
|                                 | ISO5              | 545.13                                 | 25     | 14400    | <10    | 1.03E+07                        | NO <sub>x</sub> -free | 0.005                | 88.9                              |
|                                 | ISO6              | 235.8147                               | 25     | 14400    | <10    | 1.24E+07                        | NO <sub>x</sub> -free | 0.005                | 48.9                              |
|                                 | ISO7              | 108.0237                               | 25     | 14400    | <10    | 1.36E+07                        | NO <sub>x</sub> -free | 0.005                | 17.4                              |
|                                 | ISO8              | 89.64855                               | 25     | 14400    | <10    | 1.67E+07                        | NO <sub>x</sub> -free | 0.005                | 4                                 |
|                                 | ISO9              | 40.09128                               | 25     | 14400    | <10    | 1.65E+07                        | NO <sub>x</sub> -free | 0.005                | 2.9                               |
| (Xu et al., 2014)               | ISO10             | 126.6773                               | 25     | 72000    | <5     | 1.04E+06                        | <0.01                 | <0.001               | 16.3                              |
|                                 | ISO11             | 218.2747                               | 25     | 72000    | <5     | 8.20E+05                        | <0.01                 | <0.001               | 14.7                              |
|                                 | ISO12             | 402.8616                               | 25     | 72000    | <5     | 4.40E+05                        | <0.01                 | <0.001               | 130.2                             |
|                                 | ISO13             | 270.3377                               | 25     | 72000    | <5     | 4.64E+06                        | 68.1                  | <0.001               | 119.7                             |
|                                 | ISO14             | 254.4682                               | 25     | 72000    | <5     | 4.40E+06                        | 114.8                 | <0.001               | 119.7                             |
|                                 | ISO15             | 319.0597                               | 25     | 72000    | <5     | 3.58E+06                        | 338.2                 | <0.001               | 127                               |
|                                 | ISO16             | 293.7243                               | 25     | 72000    | <5     | 3.35E+06                        | 466.2                 | <0.001               | 110.9                             |
|                                 | ISO17             | 280.0821                               | 25     | 72000    | <5     | 2.72E+06                        | 738.1                 | <0.001               | 14.2                              |
| (Kroll et al., 2005)            | ISO18             | 707.6652                               | 20.1   | 10800    | 42.4   | N/A                             | 242                   | 0.07                 | 11.9                              |
|                                 | ISO19             | 283.2594                               | 19.9   | 10800    | 47.3   | N/A                             | 240                   | 0.004                | 4.4                               |
|                                 | ISO20             | 141.1958                               | 20.8   | 10800    | 46.6   | N/A                             | 213                   | 0.01                 | 0.9                               |
|                                 | ISO21             | 70.57389                               | 20.9   | 10800    | 41.1   | N/A                             | 202                   | 0.025                | 0.5                               |
|                                 | ISO22             | 495.1967                               | 20.2   | 10800    | 44.2   | N/A                             | 240                   | 0.119                | 5.5                               |
|                                 | ISO23             | 1060.051                               | 20.5   | 10800    | 49.5   | N/A                             | 239                   | 0.213                | 16.3                              |
|                                 | ISO24             | 211.0037                               | 21.9   | 10800    | 48.1   | N/A                             | 255                   | 0.032                | 2.3                               |
|                                 | ISO25             | 169.2046                               | 21.2   | 10800    | 43.1   | N/A                             | 249                   | 0.024                | 1.5                               |
| (Brégonzio-Rozier et al., 2015) | ISO26             | 1348.101                               | 18.1   | 25200    | <5     | 4.00E+06                        | 151                   | 0.347                | 8.4                               |
|                                 | ISO27             | 1433.425                               | 16.4   | 25200    | <5     | 4.00E+06                        | 93                    | 0.546                | 4.7                               |
|                                 | ISO28             | 1389.462                               | 16.6   | 25200    | <5     | 4.00E+06                        | 77                    | 0.397                | 1.6                               |
|                                 | ISO29             | 1316.706                               | 20     | 25200    | <5     | 4.00E+06                        | 114                   | 0.495                | 12.4                              |
|                                 | ISO30             | 1292.034                               | 21.1   | 25200    | <5     | 4.00E+06                        | 140                   | 0.3                  | 7.3                               |
|                                 | ISO31             | 1313.121                               | 20.8   | 25200    | <5     | 4.00E+06                        | 112                   | 0.286                | 5.5                               |
|                                 | ISO32             | 1299.783                               | 21.9   | 25200    | <5     | 4.00E+06                        | 132                   | 0.359                | 6.2                               |
|                                 | ISO33             | 1273.809                               | 21.4   | 25200    | <5     | 4.00E+06                        | 101                   | 0.174                | 7.8                               |
|                                 | ISO34             | 1257.499                               | 20.6   | 25200    | <5     | 4.00E+06                        | 117                   | 0.175                | 4.4                               |
|                                 | ISO35             | 1252.966                               | 21     | 25200    | <5     | 4.00E+06                        | 111                   | 0.113                | 0.3                               |
|                                 | ISO36             | 1225.105                               | 24.3   | 25200    | <5     | 4.00E+06                        | 97                    | 0.131                | 0.1                               |

|            |       |          |      |       |    |          |     |       |       |
|------------|-------|----------|------|-------|----|----------|-----|-------|-------|
|            | ISO37 | 2372.511 | 18.3 | 25200 | <5 | 1.90E+06 | 133 | 0.201 | 2.8   |
|            | ISO38 | 2399.036 | 17.5 | 25200 | <5 | 1.90E+06 | 66  | 0.054 | 2.4   |
|            | ISO39 | 2273.292 | 19.7 | 25200 | <5 | 1.90E+06 | 185 | 0.081 | 0.15  |
|            | ISO40 | 509.6928 | 20   | 54000 | 47 | N/A      | 79  | 0.158 | 1     |
|            | ISO41 | 574.8203 | 20   | 54000 | 51 | N/A      | 40  | 0.1   | 0.7   |
|            | ISO42 | 993.901  | 20   | 54000 | 52 | N/A      | 166 | 0.214 | 5     |
|            | ISO43 | 1042.039 | 20   | 54000 | 84 | N/A      | 144 | 0.175 | 3.7   |
|            | ISO44 | 1277.064 | 20   | 54000 | 51 | N/A      | 169 | 0.192 | 12.9  |
|            | ISO45 | 1330.865 | 20   | 54000 | 53 | N/A      | 80  | 0.203 | 10    |
| (Domm      | ISO46 | 1339.359 | 20   | 54000 | <2 | N/A      | 100 | 0.234 | 22.6  |
| en et al., | ISO47 | 1339.359 | 20   | 54000 | 9  | N/A      | 115 | 0.25  | 9.2   |
| 2006)      | ISO48 | 1359.181 | 20   | 54000 | <2 | N/A      | 162 | 0.235 | 16.8  |
|            | ISO49 | 1359.181 | 20   | 54000 | 52 | N/A      | 178 | 0.257 | 9.6   |
|            | ISO50 | 1427.14  | 20   | 54000 | <2 | N/A      | 164 | 0.25  | 17.5  |
|            | ISO51 | 2367.24  | 20   | 54000 | 50 | N/A      | 579 | 0.391 | 86.5  |
|            | ISO52 | 3128.948 | 20   | 54000 | 53 | N/A      | 491 | 0.337 | 50.7  |
|            | ISO53 | 4859.072 | 20   | 54000 | 50 | N/A      | 825 | 0.45  | 177.4 |
|            | ISO54 | 5026.138 | 20   | 54000 | 49 | N/A      | 934 | 0.458 | 217   |

Table S3. Experimental information for isoprene

#### SOMA model experimental fitting

This section presents the multi variable linear regression analysis performed for experimental fitting of SOMA for the case of  $\alpha$ -pinene, limonene, and isoprene. We show the regression graphs between  $SOA_{exp}/SOA_{orig}$  and  $O_{3exp}/O_{3gecko}$ ,  $T_{exp}/T_{gecko}$  and  $RH_{exp}/RH_{gecko}$  for every compound taken from Tables S1–S3. Here,  $SOA_{orig}$  represents the SOA predicted by the model under initial experimental conditions without applying correction factors, while  $SOA_{exp}$  is the experimentally measured SOA. The aim of this analysis is to develop correction factors for the model's SOA yield parameter by assessing how the  $SOA_{orig}/SOA_{exp}$  ratio varies with changes in the  $O_{3exp}/O_{3gecko}$ ,  $T_{exp}/T_{gecko}$  and  $RH_{exp}/RH_{gecko}$  ratios. GECKO–A assumes constant conditions of  $O_{3gecko} = 0.04$  ppm,  $T_{gecko} = 25^{\circ}C$  and  $RH_{gecko} = 70\%$  in SOA yield production. This approach addresses a key limitation of the current SOA model, which selects yield values based solely on  $NO_x$  levels. The resulting correction factors will enable the model to better account for varying environmental conditions, ultimately improving its ability to capture the effects of  $O_3$ , T, and RH on SOA formation.

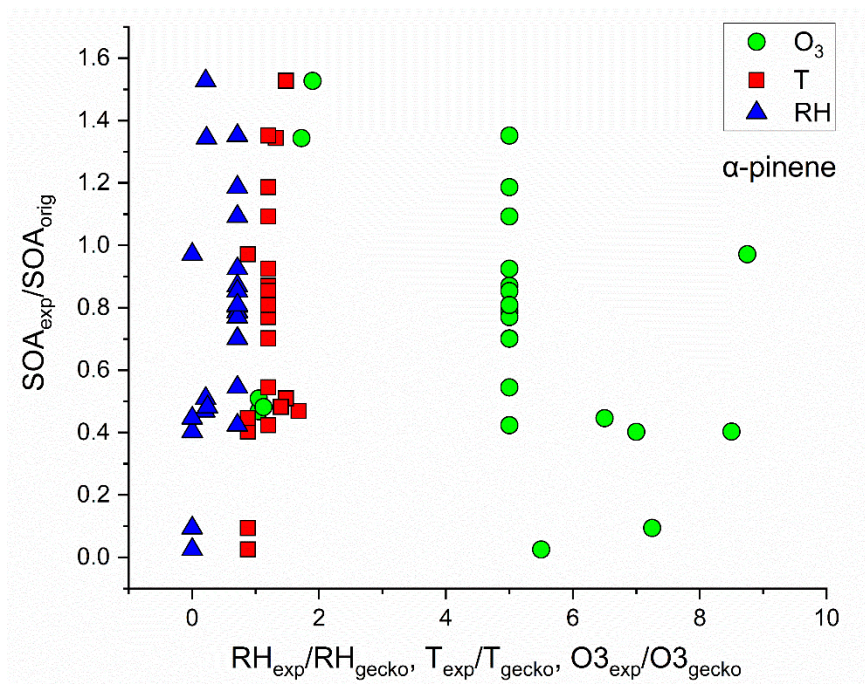

Figure S1. Regression analysis for  $\alpha$ -pinene

Equation produced by multivariable linear regression analysis for the case of  $\alpha$ -pinene:

$$\frac{SOA_{exp}}{SOA_{orig}} = -0.8 + 0.1 \times \frac{O_{3exp}}{O_{3gecko}} + 1 \times \frac{T_{exp}}{T_{gecko}} + 0.3 \times \frac{RH_{exp}}{RH_{gecko}} \quad (18)$$

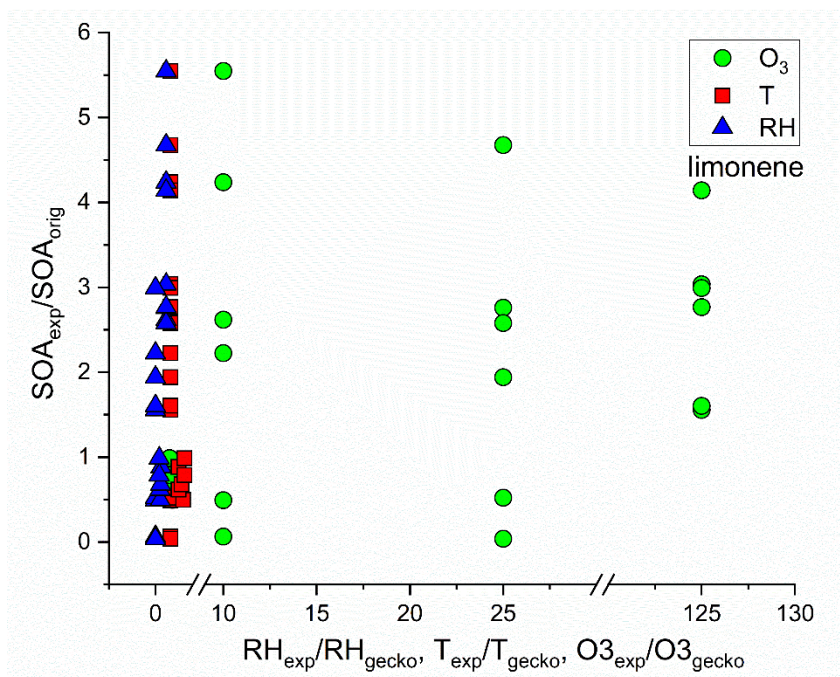

Figure S2. Regression analysis for limonene

Equation produced by multivariable linear regression analysis for the case of limonene:

$$\frac{SOA_{exp}}{SOA_{orig}} = 2.7 + 0.01 \times \frac{O_{3exp}}{O_{3gecko}} - 1.9 \times \frac{T_{exp}}{T_{gecko}} + 4 \times \frac{RH_{exp}}{RH_{gecko}} \quad (19)$$

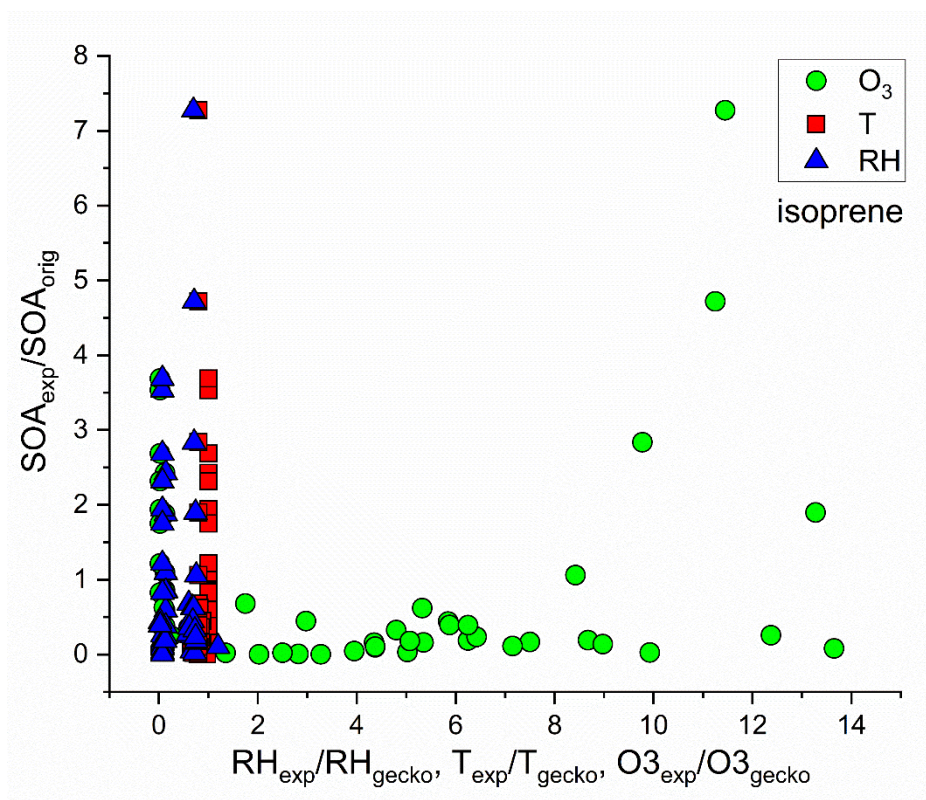

65 Figure S3. Regression analysis for isoprene

Equation produced by multivariable linear regression analysis for the case of isoprene:

$$\frac{SOA_{exp}}{SOA_{orig}} = -8.9 + 0.2 \times \frac{O_{3exp}}{O_{3gecko}} + 10.2 \times \frac{T_{exp}}{T_{gecko}} + 1.1 \times \frac{RH_{exp}}{RH_{gecko}} \quad (20)$$

#### SOMA model calibration

This section presents the corrections applied to the SOMA for  $\alpha$ -pinene, limonene and isoprene. Figure S4 illustrates the comparison between the experimental SOA values, the uncorrected model predictions, and the model outputs after incorporating corrections for O<sub>3</sub>, RH, and T in the case of  $\alpha$ -pinene. The deviation from the experimental data was 17% for the original model, which improved to 4% with the correction. Figure S5 compares the model outputs before and after corrections, with experimental results for limonene. The initial model showed a 14.2% deviation from experimental values, which was reduced to 13.7% after the correction. In Figure S6, the same analysis is conducted for isoprene. The original model exhibited an average 39% deviation from experimental data, which was reduced to 32% after the usage of correction factors derived from regression analysis. While the corrections for isoprene did not achieve the desired accuracy, incorporating additional experimental data could improve the calibration of the model for this compound.



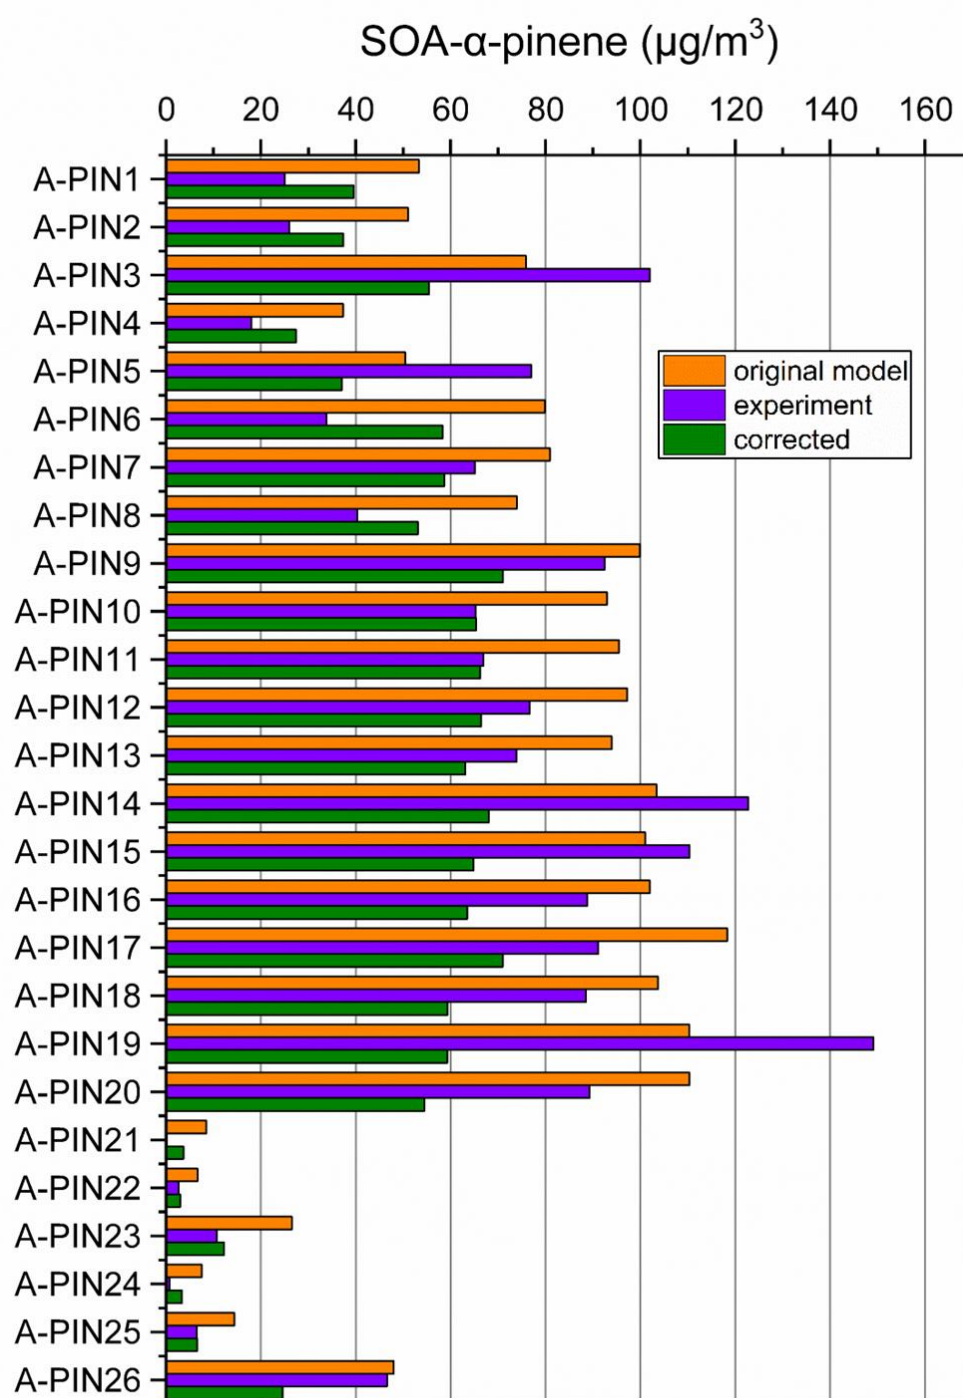

Figure S4. SOMA model correction for  $\alpha$ -pinene

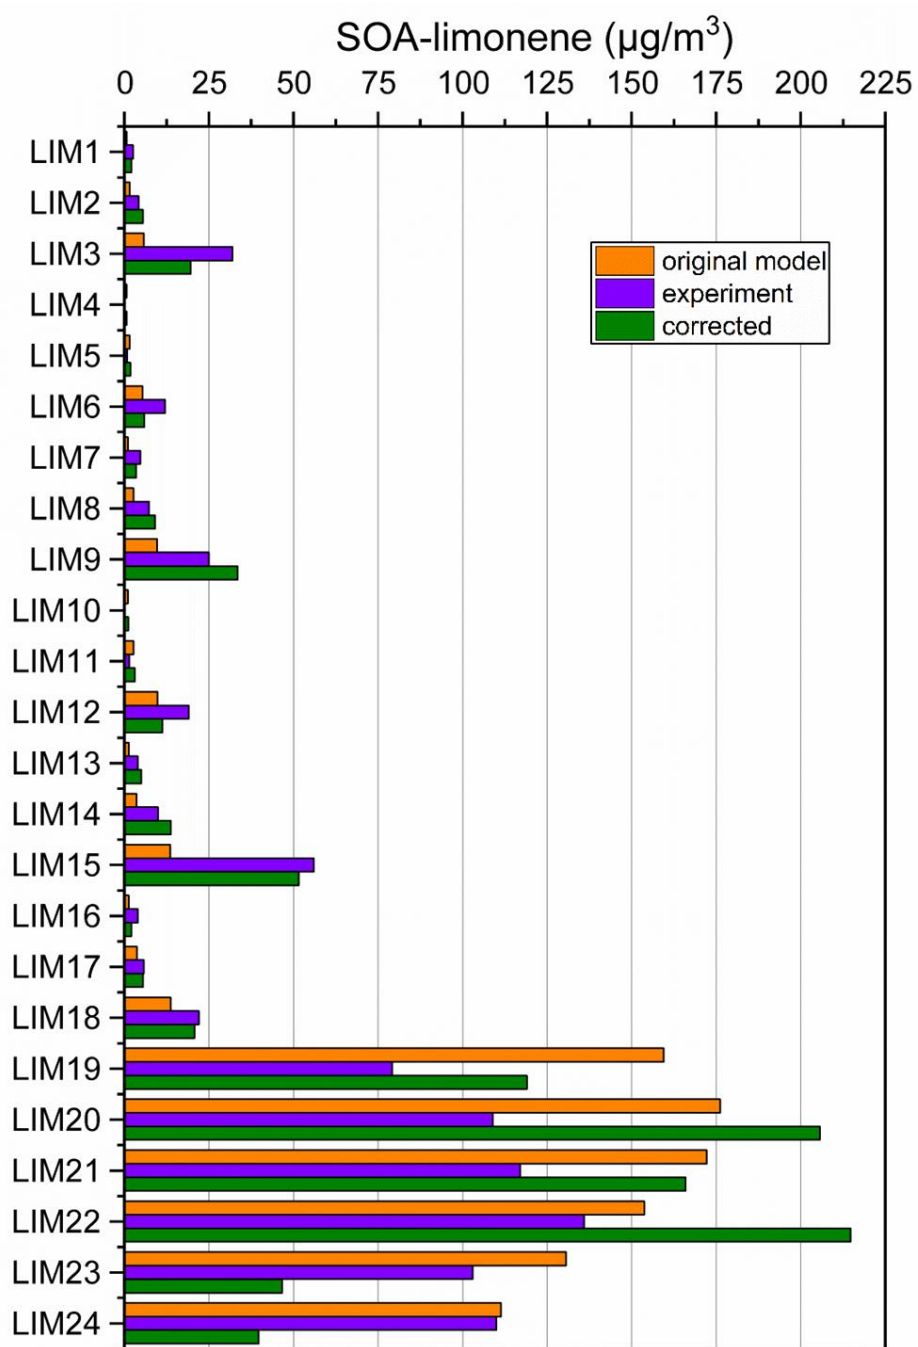

Figure S5. SOMA model correction for limonene



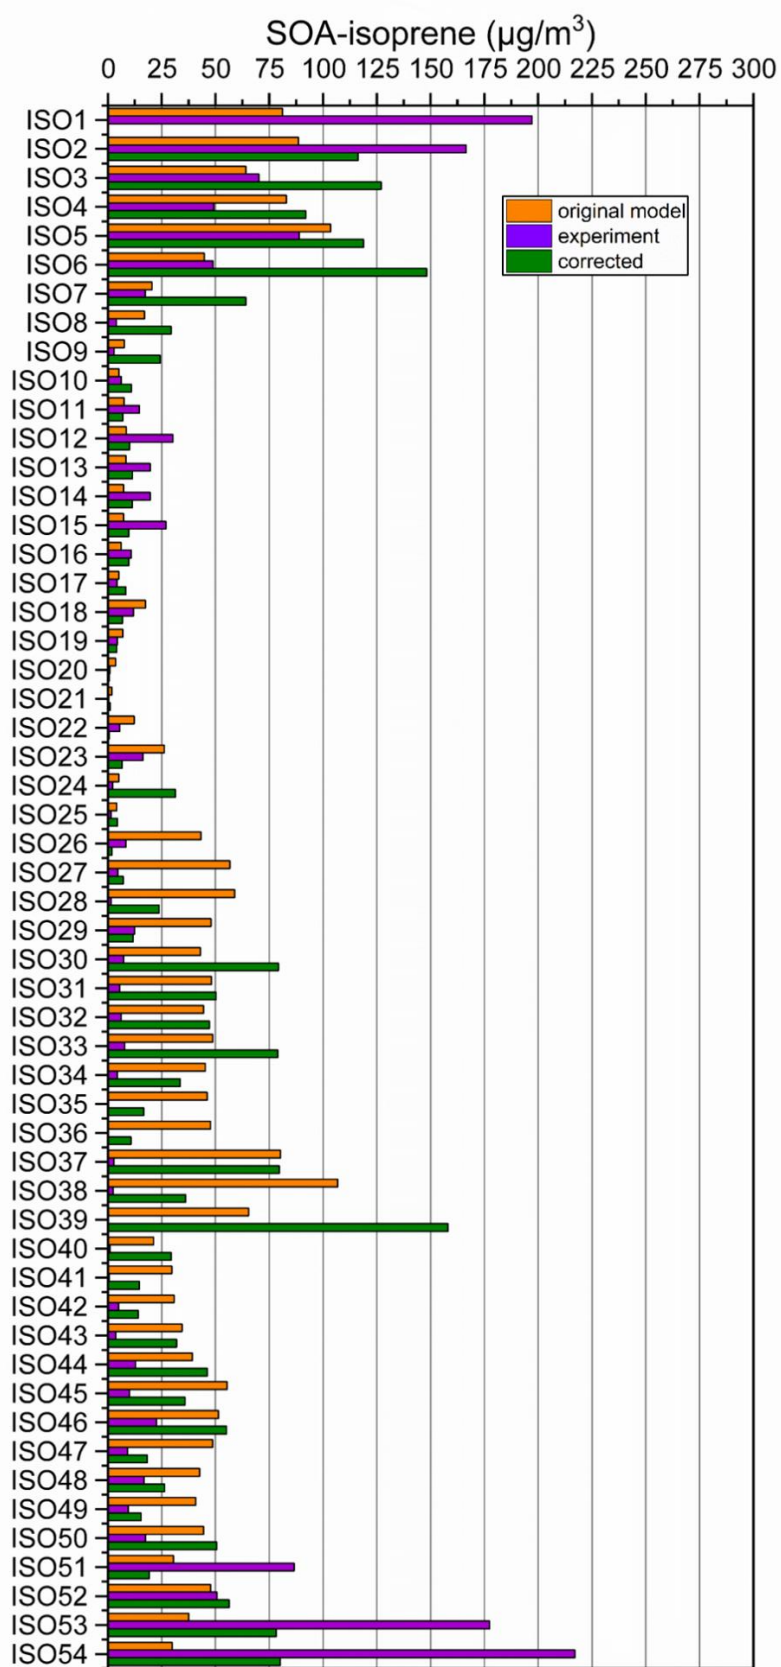

85 Figure S6. SOMA model correction for isoprene
